# Supplementary material for: Community-Based Rehabilitation Post Hospital Discharge Interventions for Older Adults With Cognitive Impairment Following a Hip Fracture: A Systematic Review Protocol
Source: PubMed Central journal article supplement (PMC4180327; doi:10.2196/resprot.3485), 2014-09-16
Supplement: resprot_v3i3e47_app1.pdf [file resprot_v3i3e47_app1.pdf]

## Multimedia Appendix 1

Search Strategy Example for Medline

Database: Ovid MEDLINE(R) 1946 to January Week 2 2014

Search Strategy:

- 1 exp dementia/ (114350)
- 2 delirium/ (5403)
- 3 wernicke encephalopathy/ (1353)
- 4 Delirium, Dementia, Amnestic, Cognitive Disorders/ (8485)
- 5 (dement\* or alzheimer\*).mp. (144174)
- 6 (lewy\* adj2 bod\*).mp. (5767)
- 7 ("organic brain disease\*" or "organic brain syndrome\*").mp. (972)
- 8 deliri\*.mp. (18416)
- 9 (chronic adj2 cerebrovascular).tw. (411)
- 10 (cerebr\* adj2 deteriorat\*).tw. (168)
- 11 (pick\* adj2 disease).mp. (2652)
- 12 (cerebral\* adj2 insufficient\*).tw. (56)
- 13 huntington\*.mp. (12480)
- 14 binswanger\*.mp. (524)
- 15 korsako\*.mp. (1339)
- 16 (creutzfeldt or jcd or cjd).mp. (7279)
- 17 ((cognitiv\* or cognition\*) adj3 (impair\* or disord\*)).mp. (75678)
- 18 exp Cognition Disorders/ (58694)
- 19 or/1-18 (222034)
- 20 exp Hip Fractures/ (16928)
- 21 ((femur\* or femoral\*) adj3 (neck or proximal) adj4 fracture\*).tw. (6750)
- 22 Hip/ (8533)
- 23 Fractures, Bone/ (45504)
- 24 22 and 23 (224)
- 25 ((hip\* or pertrochant\* or intertrochant\* or trochanteric or subtrochanteric or extracapsular\* or orthop\*) adj4 fracture\*).tw. (13927)
- 26 20 or 21 or 24 or 25 (23507)
- 27 19 and 26 (854)
